# Supplementary material for: A Fatal Case of Metastatic Pulmonary Calcification during the Puerperium
Source: MDPI journal article supplement (doi:10.3390/ijms232315131), 2022-12-01
Supplement: s1 [file s1]

**Table S1a.** Blood test parameters - [normal laboratory values].

| <b>BNP</b><br>[<80 pg/ml]      | <b>WBC</b><br>[4.30 – 10.50<br>x10 <sup>3</sup> ] | <b>RBC</b><br>(4.20 – 5.80<br>x10 <sup>6</sup> ) | <b>Hb</b><br>(12.0 - 17.50<br>g/dL) | <b>Hct</b><br>(37.0 – 52.0%)         | <b>Plt</b><br>[130 – 400<br>x10 <sup>3</sup> ] | <b>Neu</b><br>[40.0 – 74.0 %]   | <b>Creatine</b><br>[0.6 – 1.2<br>mg/dL] | <b>Na<sup>+</sup></b><br>[136 – 146<br>meq/L] | <b>Ca<sup>++</sup></b><br>[2.5 – 4.5<br>mg/dL] | <b>P</b><br>[2.5 – 4.5<br>mg/dL]   |
|--------------------------------|---------------------------------------------------|--------------------------------------------------|-------------------------------------|--------------------------------------|------------------------------------------------|---------------------------------|-----------------------------------------|-----------------------------------------------|------------------------------------------------|------------------------------------|
| 132                            | 6.31                                              | 4.21                                             | 12.5                                | 31.5                                 | 257                                            | 84.8                            | 5.42                                    | 128                                           | 13.5                                           | 5.0                                |
| <b>LDH</b><br>[0 – 248<br>U/L] | <b>PT INR</b><br>[0.8 – 1.20]                     | <b>APT</b><br>[17 – 35<br>sec.]                  | <b>APT ratio</b><br>[0.8 – 1.2]     | <b>Fibr.</b><br>[150 – 450<br>mg/dL] | <b>D-Dim</b><br>(< 55 µg/L)                    | <b>PCR</b><br>[< 0.35<br>mg/dL] | <b>PCT</b><br>[<0.5<br>ng/mL]           | <b>Azoto</b><br>[5 – 25<br>mg/dL]             | <b>Prot.</b><br>[6.6 – 8.3<br>g/dL]            | <b>Alb.</b><br>[3.5 – 5.2<br>g/dL] |
| 301                            | 2.36                                              | 36                                               | 1.2                                 | 537                                  | 3900                                           | 9.1                             | 75.00                                   | 100                                           | 4.6                                            | 2.1                                |

**Table S1b.** Arterial gas tests.

| <b>Emergency Department admission</b> |                                 |                                  |                                   |                                  |                                    |                        |                     |                   |                                                |            |                       |
|---------------------------------------|---------------------------------|----------------------------------|-----------------------------------|----------------------------------|------------------------------------|------------------------|---------------------|-------------------|------------------------------------------------|------------|-----------------------|
| <b>pH</b>                             | <b>PO<sub>2</sub></b><br>(mmHg) | <b>PCO<sub>2</sub></b><br>(mmHg) | <b>Na<sup>+</sup></b><br>(mmol/L) | <b>K<sup>+</sup></b><br>(mmol/L) | <b>Ca<sup>++</sup></b><br>(mmol/L) | <b>Lac</b><br>(mmol/L) | <b>Hb</b><br>(g/dL) | <b>Hct</b><br>(%) | <b>HCO<sub>3</sub><sup>-</sup></b><br>(mmol/L) | <b>P/F</b> | <b>BE</b><br>(mmol/L) |
| 7.31                                  | 57.5                            | 34.4                             | 125.0                             | 3.9                              | 2.0                                | 4.2                    | 12.7                | 42.9              | 16.9                                           | 273.7      | -8.37                 |
| <b>ICU admission</b>                  |                                 |                                  |                                   |                                  |                                    |                        |                     |                   |                                                |            |                       |
| <b>pH</b>                             | <b>PO<sub>2</sub></b><br>(mmHg) | <b>PCO<sub>2</sub></b><br>(mmHg) | <b>Na<sup>+</sup></b><br>(mmol/L) | <b>K<sup>+</sup></b><br>(mmol/L) | <b>Ca<sup>++</sup></b><br>(mmol/L) | <b>Lac</b><br>(mmol/L) | <b>Hb</b><br>(g/dL) | <b>Hct</b><br>(%) | -                                              | <b>P/F</b> | <b>BE</b><br>(mmol/L) |
| 6.77                                  | 48.6                            | 101.1                            | 132.4                             | 7.36                             | 2.025                              | 9.3                    | 11.4                | 43.5              | -                                              | 48.6       | -                     |
